# Supplementary material for: Prognostic and Predictive Value of Cadherin 11 for Patients with Gastric Cancer and Its Correlation with Tumor Microenvironment: Results from Microarray Analysis
Source: Biomed Res Int. 2020 Jun 26;2020:8107478. doi: 10.1155/2020/8107478 (PMC7335407; doi:10.1155/2020/8107478)
Supplement: Supplementary Materials — Figure S1: expression levels of CDH11 in various human cancers from the GEPIA database. Figure S2: Kaplan-Meier survival curves comparing the high and low expressions of CDH11 in various cancers from the GEPIA database. Figure S3: different levels of CDH11 expression between different lymph node metastases of GC patients. Table S1: CDH11 expression in gastric, colorectal, and pancreatic cancers from the Oncomine database. Table S2: the information of datasets used for differential analysis in the study. Table S3: the relationship between CDH11 and disease progression in patients with gastric cancer. [file 8107478.f1.zip]

Archive with 8 entries (7 files):
- Supplementary files/
- Supplementary files/Figure S1 Expression levels of CDH11 in various human cancers in the GEPIA database.tif
- Supplementary files/f2.tif
- Supplementary files/Figure S3 Expression levels of CDH11 in gastric cancer with lymph node metastasis in the GEO database.tif
- Supplementary files/Table S1 CDH11 expression in gastric,  colorectal and pancreaticcancers from the Oncomine database.docx
- Supplementary files/Table S2 The information of datasets used for differential analysis in the study.docx
- Supplementary files/Table S3 The relationship between CDH11 and disease progression in patients with gastric cancer.docx
- Supplementary files/The description of Supplementary FigureS1-3.docx
